1 **Dynamic chromosome rearrangements of the white-spotted bamboo shark shed light on**  
2 **cartilaginous fish diversification mechanisms**

3 Yaolei Zhang<sup>1,4,†</sup>, Haoyang Gao<sup>1,4,†</sup>, Hanbo Li<sup>1,4,†</sup>, Jiao Guo<sup>1,4,†</sup>, Meiniang Wang<sup>2,4</sup>, Qiwu  
4 Xu<sup>1,4</sup>, Jiahao Wang<sup>1,4</sup>, Meiqi Lv<sup>1,4</sup>, Xinyu Guo<sup>1,4</sup>, Qun Liu<sup>1,4</sup>, Likun Wei<sup>5</sup>, Han Ren<sup>2,4</sup>, Yang  
5 Xi<sup>2,4</sup>, Yang Guo<sup>1,4</sup>, Qian Zhao<sup>1,4</sup>, Shanshan Pan<sup>1,4</sup>, Chuxin Liu<sup>2,4</sup>, Liping Sang<sup>1,4</sup>, Xiaoyan  
6 Ding<sup>1,4</sup>, Chen Wang<sup>1,4</sup>, Haitao Xiang<sup>2,4</sup>, Yue Song<sup>1,4</sup>, Yujie Liu<sup>1,4</sup>, Shanshan Liu<sup>1,4</sup>, Yuan  
7 Jiang<sup>2,6</sup>, Changwei Shao<sup>7</sup>, Jiahai Shi<sup>5</sup>, Shiping Liu<sup>2,4</sup>, Jamal S. M. Sabir<sup>9</sup>, Mumdooh J. Sabir<sup>9</sup>,  
8 Muhummadh Khan<sup>9</sup>, Nahid H. Hajrah<sup>9</sup>, Simon Ming-Yuen Lee<sup>3</sup>, Xun Xu<sup>2,4</sup>, Huanming  
9 Yang<sup>2,8</sup>, Jian Wang<sup>2,8</sup>, Guangyi Fan<sup>1,3,4,\*</sup>, Naibo Yang<sup>2,6,\*</sup> & Xin Liu<sup>1,2,4,\*</sup>

10

11 <sup>1</sup>BGI-Qingdao, BGI-Shenzhen, Qingdao 266555, China

12 <sup>2</sup>BGI-Shenzhen, Shenzhen 518083, China

13 <sup>3</sup>State Key Laboratory of Quality Research in Chinese Medicine and Institute of Chinese  
14 Medical Sciences, Macao, China

15 <sup>4</sup>China National GeneBank, BGI-Shenzhen, Shenzhen 518120, China

16 <sup>5</sup>City University of Hongkong, Kowloon, Hongkong SAR

17 <sup>6</sup>Complete Genomics, Inc., San Jose, CA 95134, USA

18 <sup>7</sup>Yellow Sea Fisheries Research Institute, CAFS, Key Laboratory for Sustainable  
19 Development of Marine Fisheries, Ministry of Agriculture, Qingdao 266071,  
20 China

21 <sup>8</sup>James D. Watson Institute of Genome Sciences, Hangzhou 310058, China

22 <sup>9</sup>Department of Biological Sciences, King Abdulaziz University (KAU), Jeddah 21589, Saudi  
23 Arabia

24 <sup>†</sup>These authors contributed equally to this work.

25 <sup>\*</sup>Correspondence should be addressed to Xin Liu ([liuxin@genomics.cn](mailto:liuxin@genomics.cn)), Naibo Yang  
26 (<mailto:nyang@completegenomics.com>) and Guangyi Fan ([fanguangyi@genomics.cn](mailto:fanguangyi@genomics.cn)).

27

28 **Abstract**

29 Cartilaginous fishes have a very high phenotypical diversity, a phenomenon for which the  
30 mechanisms have been largely unexplored. Here, we report the genome of the white-spotted  
31 bamboo shark as the first chromosome-level genome assembly of cartilaginous fish. Using  
32 this genome, we illustrated a dynamic chromosome rearrangement process in the bamboo  
33 shark, which resulted in the formation of 13 chromosomes, all of which were sparsely  
34 distributed with conserved genes and fast-evolving. We found the fast-evolving  
35 chromosomes to be enriched in immune-related genes with two chromosomes harboring the  
36 major genes for developing the single-chain antibody. We also found chromosome  
37 rearrangements to have resulted in the loss of two genes (*p2rx3* and *p2rx5*) which we also  
38 showed were involved in cartilage development using a CRISPR/Cas9 approach in zebrafish.  
39 Our study highlighted the significance of chromosome rearrangements in the phenotypical  
40 evolution of cartilaginous fishes, providing clues to inform further studies on mechanisms for  
41 fish diversification.

## 42 **Introduction**

43 The white-spotted bamboo shark, *Chiloscyllium plagiosum*, (hereinafter referred to as  
44 bamboo shark) belongs to the class of Chondrichthyes, which is one of the oldest extant  
45 jawed vertebrate groups <sup>1</sup>. The cartilaginous fishes diverged from a common vertebrate  
46 ancestor about 460-520 million years ago (MYA), and have been since evolving  
47 independently into distinct lineages <sup>2</sup>. Most cartilaginous fishes have a large number of  
48 chromosomes and this number varies between species ( $2n= 66\sim 104$ ) <sup>3,4</sup>, but the chromosomal  
49 evolution of cartilaginous fishes has remained largely unexplored. To better understand the  
50 evolution of these fishes, we sequenced and assembled the genome of a female bamboo  
51 shark. We then constructed a chromosome level reference genome, identified dynamic  
52 chromosome rearrangement events and analyzed their evolutionary consequences. Our results  
53 are innovative and significant, which are different from previous cartilaginous fish genome<sup>5</sup>.

## 54 **Results**

55 We assembled a 3.85 Gb genome assembly with 51 chromosomes using a whole genome  
56 shotgun strategy combined with Hi-C sequencing data. To our knowledge, this is the first  
57 cartilaginous fish genome to be assembled at the chromosome level (with ~95.8% of the

58 Benchmarking Universal Single-Copy Orthologs, BUSCOs<sup>6</sup>, to be complete in the genome,  
59 and **Supplementary Figure 1-4 and Supplementary Table 1-6**). Syntenic relationships  
60 revealed unambiguous alignment of 41 bamboo shark chromosomes to 29 chicken  
61 chromosomes (**Supplementary Figure 5**), while alignment between bamboo shark  
62 chromosomes and zebrafish chromosomes indicated a number of intricate matchups  
63 (**Supplementary Figure 6**), an observation which was consistent with the previous finding of  
64 extensive interchromosomal rearrangements in zebrafish<sup>7</sup>.

65 We then reconstructed the ancestral chromosomes of cartilaginous fishes by identifying  
66 and inspecting the paralogous and orthologous genes between the bamboo shark genome and  
67 the elephant shark genome<sup>8</sup> following a previously described method<sup>9</sup> (**Supplementary**  
68 **Table 7**). Finally, we constructed 21 putative ancestral chromosomes and illustrated an  
69 evolutionary scenario in which eight fission and five fusion events occurred (color arrows),  
70 possibly for all sharks (**Fig. 1a**). As for the bamboo shark, nine fission and four fusion events  
71 (black and dotted arrows) occurred, resulting in six candidate daughter chromosomes (Chr8,  
72 Chr29, Chr38 and Chr39, Chr45, Chr48) (**Fig. 1a, Supplementary Table 7** and

73 **Supplementary Figure 7)**. All of these rearrangements ultimately resulted in the 51  
74 chromosomes of the bamboo shark genome along with individual gene gains and losses.

75 To identify the potential causes and consequences of dynamic chromosome  
76 rearrangements in cartilaginous fishes, we further analyzed the distribution of conserved  
77 genes in cartilaginous fishes along the bamboo shark chromosomes. We identified 6,205  
78 orthologous genes (~31.66% of total genes) shared by the bamboo shark, elephant shark and  
79 whale shark (**Supplementary Figure 8**). After exclusion of the genes shared among these  
80 three cartilaginous fishes and representative bony fishes (medaka<sup>7</sup>, **Supplementary Figure 9**  
81 and spotted gar<sup>10</sup>, **Supplementary Figure 10**), we identified 3,678 genes conserved in  
82 cartilaginous fishes (**Fig. 1b**). Interestingly, we found those genes to be unevenly distributed  
83 along bamboo shark chromosomes with conserved genes on chromosomes 8, 37, 39, 41, 43,  
84 44, 45, 46, 47, 48, 49, 50 and 51 - notably fewer than those of other chromosomes (Mann-  
85 Whitney U test,  $p$ -value<0.001, **Fig. 1b** and **Supplementary Table 8**). We then evaluated the  
86 evolutionary rate of genes on these chromosomes by calculating the  $K_S$  (synonymous  
87 substitutions per synonymous site) values of 160 single copy orthologous genes on these 13  
88 chromosomes (mean  $K_S$  value: 2.79), which was notably higher than that of other

89 chromosomes (mean  $K_S$  value: 1.54) (Mann-Whitney U test,  $p$ -value<0.001, **Fig. 1c**). In  
90 addition, we found heterozygous SNPs in the genome of the individual we sequenced to be  
91 notably more frequent on these 13 chromosomes than other chromosomes (Mann-Whitney U  
92 test,  $p$ -value<0.001, **Fig. 1b**). All of these findings above suggest that these 13 chromosomes  
93 are fast-evolving. Enrichment analysis (according to the Kyoto Encyclopedia of Genes and  
94 Genomes (KEGG)-assigned gene functions and pathways) showed that genes on these 13  
95 fast-evolving chromosomes are significantly enriched in immune-related pathways with 171  
96 immune-related genes (Mann-Whitney U test,  $p$ -value<0.01, **Supplementary Table 9-10**).  
97 These include allograft rejection, antigen processing and presentation, as well as intestinal  
98 immune network for IgA production.

99 Among the fast-evolving chromosomes that we identified, Chr37 and Chr44 likely  
100 underwent a special self-fusion event after a possible whole-genome duplication event (**Fig.**  
101 **1a**). We found that major histocompatibility complex (MHC) genes (11 class I and 3 class II  
102 genes) are notably enriched on Chr37 (**Fig. 1d**), only except those on unanchored scaffold  
103 sequences. MHC genes were not found in the amphioxus genome while one fragment of a  
104 possible MHC class II gene was found in sea lamprey<sup>11</sup>. Upon further investigation of MHC

105 gene numbers in other species, we found both MHC class I and class II genes in cartilaginous  
106 fishes and bony fishes except for the elephant shark, which lacked MHC class II genes  
107 according to our analysis (**Supplementary Table 11-13** and **Supplementary Figure 11**).

108 These results suggest that the innate immune system played a major role in defending against  
109 infections in amphioxus and sea lamprey, while cartilaginous and bony fishes evolved to  
110 acquire a complete MHC-based, adaptive immune system. The differences in these immune  
111 systems may have arisen from the fast-evolving chromosomes. Moreover, we suggest that  
112 MHC class II genes were likely acquired before MHC class I genes based on our  
113 identification of an MHC class II-like fragment in the starlet sea anemone and sea lamprey<sup>11</sup>,  
114 potentially resolving a long debate about MHC evolution<sup>12-18</sup>. In contrast to the MHC genes  
115 found on Chr37, we found that the immunoglobulin new antigen receptor (IgNAR)<sup>19</sup> family  
116 (four complete IgNAR structure, CH1-CH2-CH3-CH4-CH5-V, and two incomplete IgNAR)  
117 was located on Chr44 (**Fig. 1e**), again indicating the high impact of chromosome  
118 rearrangements on immune system evolution.

119 In addition to fast-evolving chromosomes and genes, chromosome rearrangements may  
120 also play an important role in gene loss events. Comparisons of chicken, zebrafish, medaka

121 and bamboo shark showed at least four possible genome rearrangement events in the bamboo  
122 shark resulting in the loss of the gene, *p2rx5* (**Fig. 2a**), which was previously reported to be  
123 involved in bone development and homeostasis<sup>20-26</sup>. Furthermore, analysis of the whole gene  
124 family of purinergic receptor P2X in twelve species (including sea lamprey, the three sharks  
125 and eight bony fishes) showed that *p2rx3* and *p2rx5* were lost in the three cartilaginous fishes  
126 while at least five paralogs (*p2rx1*, *p2rx2*, *p2rx3*, *p2rx4*, *p2rx5*) with multiple copies were  
127 found in bony fishes (**Supplementary Figure 12** and **Supplementary Table 14-15**). P2X  
128 receptors consists of ligand-gated ion channels, and activation of the receptor triggers  
129 signaling pathways associated with Ca<sup>2+</sup> influx<sup>27-29</sup>. Moreover, P2X receptors has been  
130 showed to participate in differentiation and proliferation of osteoblast<sup>20,29,30</sup>, bone formation  
131 and resorption<sup>24,31,32</sup>. Thus, it is reasonable to assume that loss of those genes during  
132 evolution may explain the establishment of chondrification of the endoskeleton in  
133 cartilaginous fish. To verify our hypothesis, we performed a knockout of *p2rx3a* and *p2rx5*  
134 using a CRISPR/Cas9 approach in zebrafish embryos (**Supplementary Figure 13**), and the  
135 embryos of 9 days post-fertilization (dpf) were stained with alizarin red. Ventral view of 9  
136 dpf mutant embryos showed significantly reduced mineralization in multiple skeletal



137 landmarks(**Fig. 2b, c, d, f, g**), confirmed by semi-quantitative analysis of mineralization  
138 degree (mineralization area and mineralization integral optical density, IOD) in those  
139 embryos (**Fig. 2h, i, j, k**). Despite the extent of bone reduction was various due to somatic  
140 chimaerism with regard to gene disruption, the phenotype of inhibited mineralization took up  
141 a noticeable greater proportion in the knockout embryos, when compared to the wild type  
142 (**Fig. 2e**). These results in zebrafish suggest that the absence of these genes is one of the  
143 major causes of the chondrified endoskeleton in cartilaginous fish, underscoring the  
144 functional importance of genome rearrangements in evolution.

## 145 **Discussion**

146 With whole genome and Hi-C sequencing, we successfully constructed a chromosome-  
147 level genome of the bamboo shark which is, to our knowledge, the first chromosome-level  
148 genome assembly for cartilaginous fish species. Guided by the previous observation of highly  
149 divergent chromosome numbers in cartilaginous fishes, we inferred the ancestral  
150 chromosomes of cartilaginous fishes to find dynamically rearranging chromosomes during  
151 their evolution. We then illustrated the evolutionary consequences of these rearrangements,  
152 including the formation of fast-evolving chromosomes with fewer conserved genes and more

153 fast-evolving genes, as well as the loss of functionally important genes. We also inferred that  
154 these consequences ultimately resulted in phenotypic diversity, including the formation of  
155 immune systems specific to sharks and the emergence of cartilage. Our study highlights the  
156 importance of chromosome rearrangements in the diversification of cartilaginous fish, and  
157 also provides numerous insights into evolution of all species. With the highly effective  
158 methods described in this study, more chromosome-level genome assemblies can be  
159 constructed in the future to further illustrate the evolution of the oldest jawed vertebrate  
160 groups, as well as the paraphyletic group of all fishes. Our bamboo shark genome will also be  
161 significant for future immune studies and related pharmaceutical development.

## 162 **Materials and Methods**

### 163 **DNA, RNA extraction**

164 Blood samples were collected from a female bamboo shark for whole genome sequencing. 14  
165 tissue types were collected for RNA sequencing. A DNA sample was extracted from whole  
166 blood using the phenol-chloroform method and its quality and quantity were assessed by  
167 pulsed field gel electrophoresis and Qubit Fluorometer. RNA samples were extracted by  
168 using TRIzol<sup>®</sup> Reagent and was assessed by Agilent 2100.

169

170 **Library construction**

171 Firstly, for WGS libraries with average insert sizes of 180 bp and 350 bp, a Covaris E220  
172 ultrasonicator (Covaris, Brighton, UK) was used to shear the extracted high-quality DNA and  
173 AMPure XP beads (Agencourt, Beverly, the U.S.) were used to select target fragments. Then,  
174 fragment end-repairing and A-tailing were performed by T4 DNA polymerase, T4  
175 polynucleotide kinase and rTaq DNA polymerase. Next, PCR amplification of eight cycles  
176 was carried out and the single-strand circularization process was performed using T4 DNA  
177 Ligase, generating a single-stranded circular DNA library for sequencing.

178 Secondly, for mate-pair libraries, a Covaris E220 was used to acquire ~2 kb DNA  
179 fragments and Hydroshear (GeneMachines, CA, USA) was used to acquire ~5 kb, ~10 kb and  
180 ~20 kb DNA fragments. After further selection and purification of DNA, fragments were  
181 end-repaired and biotin-labeled. The modified fragments were circularized and re-fragmented  
182 using a Covaris E220. Biotin-labeled DNA fragments were captured on M280 streptavidin  
183 beads (Invitrogen, CA, USA), end-repaired, A-tailed and adaptor-ligated. Biotin-labeled  
184 fragments were PCR-amplified, purified on streptavidin-coated magnetic beads, size-selected

185 by agarose gel electrophoresis and column purification, single-stranded and re-circularized.

186 The purified PCR products were heat-denatured together with an adapter that was a reverse-

187 complement to a particular strand of the PCR product, and the single-stranded molecule was

188 then ligated using DNA ligase to get a single-stranded circular DNA library.

189 Thirdly, a blood sample was used for constructing the Hi-C library. The fresh blood cells

190 ( $5 \times 10^6$ ) were collected by centrifugation and re-suspended in 1 ml of 1x PBS by repetitive

191 pipetting. The cells were cross-linked by adding 37% formaldehyde (SIGMA, America) to

192 obtain a 1% final concentration, to which was added a 2.5M glycine solution (SIGMA,

193 America) to a final concentration of 0.2M to quench the reaction. To prepare nuclei, the

194 formaldehyde-fixed powder was resuspended in nuclei isolation buffer (10 mM Tris-HCl pH

195 8.0 (SIGMA, America), 10 mM NaCl (BEYOTIME, Shanghai, China), 1× PMSF (SIGMA,

196 St. Louis, America)) and then incubated in 0.5% SDS for 10 min at 62 °C. SDS was

197 immediately quenched with 10% Triton X-100 (SIGMA, St. Louis, America) and the nuclei

198 were collected by brief centrifugation. DNA was digested by restriction enzyme (Mbo I)

199 (NEB, Ipswich, America) and the 5' overhang was repaired using a biotinylated residue (0.4

200 mM biotin-14-Datp (INVITROGEN, America). The resulting blunt-end fragments were

201 ligated in situ (10X NEB T4 DNA ligase buffer (NEB, Ipswich, America), 10% Triton X-100  
202 (SIGMA, St. Louis, America), 10 mg/ml BSA (NEB, Ipswich, America), T4 DNA ligase  
203 (NEB, Ipswich, America)). Finally, the isolated DNA was reverse-crosslinked (adding 10  
204 mg/ml proteinase K (NEB, Ipswich, America) and 1% SDS (AMBION, Waltham, America)  
205 to the tube followed by incubation at 56°C overnight) and purified (by putting the reverse-  
206 crosslinked DNA liquid into three tubes equally, adding 1.5× volumes of AMPure XP  
207 (AGENCOURT, Brea, America) mixture to each tube, vortexing and spinning down briefly,  
208 incubating for 10 min. at room temperature, placing on the MPS (INVITROGEN, Waltham,  
209 America) for 5 min. at room temperature, discarding supernatant, washing the beads twice  
210 with 1 ml of freshly made 75% ethanol (SINOPHARM, Shanghai, China), air-drying the  
211 beads completely and resuspending the beads in 30 µl of ddH<sub>2</sub>O). The Hi-C library was  
212 created by shearing 20 ug of DNA and capturing the biotin-containing fragments on  
213 streptavidin-coated beads using Dynabeads MyOne Streptavidin T1 (INVITROGEN,  
214 Waltham, America). Then DNA fragments were end-repaired and adaptor ligation was  
215 performed. After PCR (95°C 3 min.; [98°C 20 sec., 60°C 15 sec., 72°C 15 sec.] (8 cycles);

216 72°C 10 min.), the standard circularization step required for the BGISEQ-500 platform was  
217 carried out and DNBs were prepared as previously described.

218 Fourthly, for RNA library construction, mRNA was extracted from different tissues using  
219 TRIzol<sup>®</sup> Reagent, fragmented, and then reverse-transcribed into cDNA by using Hiscript II  
220 Reverse Transcriptase (Vazyme Biotech, Nanjing City, P.R. China). Then, all single-stranded  
221 circular DNA libraries were constructed by using the same strategy described as above.

222

### 223 **Sequencing for all libraries**

224 All sequencing data were generated using the BGISEQ-500 platform. Libraries with an  
225 average insert size of 180 bp and 350 bp were sequenced yielding paired-end reads with 100  
226 bp in length. Mate-pair libraries with average insert sizes of 2k, 5k, 10k and 20k and Hi-C  
227 library were sequenced yielding reads with 50 bp in length. RNA libraries were also  
228 sequenced yielding paired-end reads with 100 bp in length.

229

### 230 **Genome assembly and annotation**

231 Firstly, we filtered raw sequencing data by discarding low-quality reads (defined as >10%  
232 bases with quality values less than 10 and >5% unidentified (N) bases), adaptor-contaminated  
233 reads and PCR duplicate reads. We trimmed a few bases at the start and end of reads  
234 according to the FastQC (v0.11.2)<sup>33</sup> results. Secondly, we randomly selected about 40X clean  
235 reads to carry out k-mer analysis to estimate the genome size (**Supplementary Figure 1**).  
236 Thirdly, we used Platanus (v1.2.4)<sup>34</sup> to perform the initial assembly with WGS clean data  
237 with parameters “assemble -k 29 -u 0.2, scaffold -l 3 -u 0.2 -v 32 -s 32 and gap\_close -s 34 -  
238 k 32 -d 5000”. We filled gaps using KGF (v1.19) and GapCloser with default parameters.  
239 Fourthly, to obtain a chromosome-level genome, HIC-Pro<sup>35</sup> was used for quality control of  
240 Hi-C sequencing data with parameters [BOWTIE2\_GLOBAL\_OPTIONS = --very-sensitive -  
241 L 30 --score-min L,-0.6,-0.2 --end-to-end -reorder;BOWTIE2\_LOCAL\_OPTIONS = --very-  
242 sensitive -L 20 --score-min L,-0.6,-0.2 --end-to-end -reorder; IGATION\_SITE = GATC;  
243 MIN\_FRAG\_SIZE = 100; MAX\_FRAG\_SIZE = 100000; MIN\_INSERT\_SIZE = 50;  
244 MAX\_INSERT\_SIZE = 1500]. Finally, the software packages Juicer<sup>36</sup> and 3d-dna<sup>37</sup> were  
245 employed to generate contact matrices of chromatin and constructed chromosomes with  
246 parameter [-m haploid -s 4 -c 5].

247 After obtaining the final chromosome-level genome, we proceeded with genome  
248 annotation including repeat contents, gene models and gene function. For repeat section, both  
249 homolog-based and *de novo* prediction strategies were carried out. In detail, RepeatMasker (v  
250 4.0.5)<sup>38</sup> and RepeatProteinMasker (v 4.0.5) were used to detect interspersed repeats and low  
251 complexity sequences against the Repbase database<sup>39</sup> at the nuclear and protein levels,  
252 respectively. Then RepeatMasker was further used to detect species-specific repeat elements  
253 using a custom database generated by RepeatModeler (v1.0.8) and LTR-FINDER (v1.0.6)<sup>40</sup>.  
254 In addition, Tandem Repeat Finder (v4.0.7)<sup>41</sup> was dispatched to predict tandem repeats. The  
255 final repeat content result was integrated using in-house scripts. Before gene model  
256 construction, we masked the repeat sequences because of their negative effect on gene model  
257 prediction. We downloaded protein sets of 13 species including *Homo sapiens*, *Mus*  
258 *musculus*, *Gallus gallus*, *Xenopus tropicalis*, *Ornithorhynchus anatinus*, *Danio rerio*, *Oryzias*  
259 *latipes*, *Strongylocentrotus purpuratus*, *Ciona intestinalis*, *Rhincodon typus* and  
260 *Callorhinchus milii* from RefSeq (release 82), *Petromyzon marinus* from Ensembl (release  
261 84) and *Branchiostoma floridae* from JGI Genome Portal ([http://genome.jgi-](http://genome.jgi-psf.org/Brafl1/Brafl1.home.html)  
262 [psf.org/Brafl1/Brafl1.home.html](http://genome.jgi-psf.org/Brafl1/Brafl1.home.html)) and aligned them to the masked genome with BLAT<sup>42</sup> to



263 identify positive match regions. GeneWise (v2.2.0)<sup>43</sup> was then used to do accurate alignments  
264 for target regions and to predict homolog-based gene models. Transcriptome reads from 14  
265 tissues including blood, eye, gill, heart, liver, muscle, spleen, stomach, dorsal fin, tail fin,  
266 pancreas, leptospira, 2 capsulogenous gland and 2 kidney samples were mapped to the  
267 genome with HISAT2<sup>44</sup> and StringTie<sup>44</sup> was used to assemble gene transcripts.  
268 TransDecoder<sup>45</sup> was then used to predict the candidate complete ORFs. Further, for *de novo*  
269 gene prediction, we employed AUGUSTUS (v3.1)<sup>46</sup> to scan the whole genome with a custom  
270 training set generated by using 2,000 high quality genes. Subsequently, we combined the  
271 homology-based and *de novo*-predicted gene sets using GLEAN<sup>47</sup> and integrated the  
272 GLEAN and transcriptome results with in-house scripts to generate a representative and non-  
273 redundant gene set. The final gene set was assigned with a potential function by aligning  
274 proteins to databases including KEGG, Swissprot, TrEMBL and InterPro.

## 275 **Evolution of chromosomes**

276 For ancestral chromosomes construction, we identified paralogous genes and orthologous  
277 genes by using criteria defined by *Salse et al*<sup>9</sup> with both Cumulative Identity Percentage  
278 (CIP) and Cumulative Alignment Length Percentage (CALP) value of 0.5 and selected genes

279 pairs defined as A match B best and B match A best. Then MCSCAN<sup>48</sup> was used to generate  
280 synteny blocks with default parameters. We first noted 54 shared duplications (with 414  
281 paralogous gene pairs) on all the chromosomes. After further integration of these duplications  
282 and gene pairs, we found 16 duplicated chromosome pairs and 5 single chromosomes. For  
283 identification of conserved genes among elephant shark, whale shark, spot gar, and medaka,  
284 the same criteria with both CIP and CALP value of 0.3 were used. The best hit of multiple  
285 matches was selected. Ks values of single copy genes were calculated by KaKs Calculator  
286 with default parameter. Heterozygosity of each chromosome was calculated by calling  
287 heterozygous SNPs generated by BWA<sup>49</sup> and SAMtools package<sup>50</sup>.

### 288 **MHC genes and P2X gene family analysis**

289 We downloaded coding sequences and proteins of *Callorhinchus milii* (GCF\_000165045.1),  
290 *Rhincodon typus* (GCF\_001642345.1), *Fugu rubripes* (GCF\_000180615.1) and *Larimichthys*  
291 *crocea* (GCF\_000972845.1) from NCBI database, *Danio rerio*, *Latimeria chalumnae*,  
292 *Oryzias latipes* and *Gasterosteus aculeatus* from Ensembl (release 84), sea lamprey from  
293 (<https://genomes.stowers.org/organism/Petromyzon/marinus>) and *Branchiostoma floridae*  
294 from JGI Genome Portal ([http://genome.jgi-psf.org/Brafl1/Brafl1\\_home.html](http://genome.jgi-psf.org/Brafl1/Brafl1_home.html)) and then

295 performed initial filtering by discarding sequences less than 30 amino acids keeping the  
296 longest transcript if one gene was present with multiple transcripts. Next, the gene function  
297 annotation of these gene sets was performed by using the same criteria as bamboo shark.  
298 Then we summarized the MHC genes and P2X gene families by using the above information.  
299 The P2X-like genes (**Supplementary Table 14**) were searched in NCBI database.

### 300 **Identification of IgNAR**

301 We downloaded IgNAR (immunoglobulin new antigen receptor from cartilaginous) nucleotide  
302 sequences from NCBI database and align these sequences to bamboo shark genome using  
303 BLAST to verify the IgNAR loci.

### 304 **Knockout of P2X genes**

305 CRISPR/Cas9 were used to cleave targeted sites of genes of interest in order to induce  
306 mutations during non-homologous end joining (NHEJ) repair in zebrafish. For *p2rx3a* and  
307 *p2rx5* genes, 3 different sgRNAs were designed to target exon 1 of *p2rx3a* and of *p2rx5*  
308 (**Supplementary Table 16**). sgRNAs were designed using software developed by an online  
309 tool of CRISPOR (<http://crispor.tefor.net>), and then synthesized and purified in our labs.  
310 Cas9 protein was bought from System Biosciences (2438 Embarcadero Way, Palo Alto, CA

311 94303). CRISPR/Cas9 molecules were transferred into one-cell staged zebrafish embryos by  
312 microinjection, 1 nL per injection with 200 pg nL<sup>-1</sup> sgRNA and 375 pg nL<sup>-1</sup> Cas9 protein.  
313 Tail clips of 9 dpf embryos were used for preparing genomic DNA, KOD-FX (TOYOBO,  
314 Japan) were employed for genotyping PCRs with primer pairs P2RX3F/R and P2RX5F/R  
315 (**Supplementary Table 17**) for *p2rx3a* and *p2rx5* assays, respectively. Purified PCR  
316 products were cloned into pMD18-T vector (TaKaRa, Japan) for transformation to DH5- $\alpha$   
317 competence cells of *Escherichia coli* and sequencing.  
318 Embryos were then stained with alizarin red that binds to calcium salt in mineralization  
319 matrix for phenotyping. Alizarin red staining followed a modified protocol<sup>51</sup>. Phenotype data  
320 were collected by microfilm photos, and all images for each test were taken under identical  
321 conditions. The mineralization area and integral optical density (IOD) of alizarin red staining  
322 were quantified with the software of Image-Pro Plus V6.0 (Media Cybernetics, USA).

323

## 324 **References**

- 325 1 McKenna, M. C. The vertebrates updated: vertebrate paleontology and evolution.  
326 *Science* **239**, 512-513, doi:10.1126/science.239.4839.512 (1988).
- 327 2 Inoue, J., Donoghue, P. C. & Yang, Z. The impact of the representation of fossil  
328 calibrations on Bayesian estimation of species divergence times. *Systematic biology* **59**,  
329 74-89, doi:10.1093/sysbio/syp078 (2010).

- 330 3 Schwartz, F. J. & Maddock, M. B. Comparisons of karyotypes and cellular DNA  
331 contents within and between major lines of elasmobranchs. *Indo-Pacific fish biology*.  
332 *Ichthyological Society of Japan, Tokyo*, 148-157 (1986).
- 333 4 Rocco, L., Costagliola, D., Liguori, I. & Stingo, V. in *Annales de Genetique*. 98-98.  
334 5 Hara, Y. *et al.* Shark genomes provide insights into elasmobranch evolution and the  
335 origin of vertebrates. *Nature ecology & evolution* **2**, 1761 (2018).
- 336 6 Simao, F. A., Waterhouse, R. M., Ioannidis, P., Kriventseva, E. V. & Zdobnov, E. M.  
337 BUSCO: assessing genome assembly and annotation completeness with single-copy  
338 orthologs. *Bioinformatics* **31**, 3210-3212, doi:10.1093/bioinformatics/btv351 (2015).
- 339 7 Kasahara, M. *et al.* The medaka draft genome and insights into vertebrate genome  
340 evolution. *Nature* **447**, 714 (2007).
- 341 8 Venkatesh, B. *et al.* Elephant shark genome provides unique insights into gnathostome  
342 evolution. *Nature* **505**, 174 (2014).
- 343 9 Salse, J., Abrouk, M., Murat, F., Quraishi, U. M. & Feuillet, C. Improved criteria and  
344 comparative genomics tool provide new insights into grass paleogenomics. *Briefings*  
345 *in bioinformatics* **10**, 619-630 (2009).
- 346 10 Braasch, I. *et al.* The spotted gar genome illuminates vertebrate evolution and facilitates  
347 human-teleost comparisons. *Nature genetics* **47**, 427 (2015).
- 348 11 Smith, J. J. *et al.* The sea lamprey germline genome provides insights into programmed  
349 genome rearrangement and vertebrate evolution. *Nature genetics* **50**, 270 (2018).
- 350 12 Kaufman, J. Unfinished Business: Evolution of the MHC and the Adaptive Immune  
351 System of Jawed Vertebrates. *Annual review of immunology* **36**, 383-409 (2018).
- 352 13 Kaufman, J. in *The Immune Response to Infection* 41-55 (American Society of  
353 Microbiology, 2011).
- 354 14 Rock, K. L., Reits, E. & Neefjes, J. Present yourself! By MHC class I and MHC class  
355 II molecules. *Trends in immunology* **37**, 724-737 (2016).
- 356 15 Zhang, P. *et al.* Crystal structure of the stress-inducible human heat shock protein 70  
357 substrate-binding domain in complex with peptide substrate. *PloS one* **9**, e103518  
358 (2014).
- 359 16 Flajnik, M. F., Canel, C., Kramer, J. & Kasahara, M. Which came first, MHC class I or  
360 class II? *Immunogenetics* **33**, 295-300 (1991).
- 361 17 Kaufman, J. F., Auffray, C., Korman, A. J., Shackelford, D. A. & Strominger, J. The  
362 class II molecules of the human and murine major histocompatibility complex. *Cell* **36**,

- 363 1-13 (1984).
- 364 18 Kaufman, J. Vertebrates and the evolution of the major histocompatibility complex  
365 (MHC) class I and class II molecules. *Verhandlungen der Deutschen Zoologischen*  
366 *Gesellschaft* **81**, 131-144 (1988).
- 367 19 Feige, M. J. *et al.* The structural analysis of shark IgNAR antibodies reveals  
368 evolutionary principles of immunoglobulins. *Proceedings of the National Academy of*  
369 *Sciences*, 201321502 (2014).
- 370 20 Nicolaidou, V. *et al.* Monocytes induce STAT3 activation in human mesenchymal stem  
371 cells to promote osteoblast formation. *PloS one* **7**, e39871 (2012).
- 372 21 Sitcheran, R., Cogswell, P. C. & Baldwin, A. S. NF- $\kappa$ B mediates inhibition of  
373 mesenchymal cell differentiation through a posttranscriptional gene silencing  
374 mechanism. *Genes & development* **17**, 2368-2373 (2003).
- 375 22 Solle, M. *et al.* Altered cytokine production in mice lacking P2X7Receptors. *Journal*  
376 *of Biological Chemistry* **276**, 125-132 (2001).
- 377 23 Sun, D. *et al.* Shockwaves induce osteogenic differentiation of human mesenchymal  
378 stem cells through ATP release and activation of P2X7 receptors. *Stem Cells* **31**, 1170-  
379 1180 (2013).
- 380 24 Syberg, S. *et al.* Genetic background strongly influences the bone phenotype of P2X7  
381 receptor knockout mice. *Journal of osteoporosis* **2012** (2012).
- 382 25 Takahashi, N. *et al.* Osteoblastic cells are involved in osteoclast formation.  
383 *Endocrinology* **123**, 2600-2602 (1988).
- 384 26 Thaler, R. *et al.* Acute-phase protein serum amyloid A3 is a novel paracrine coupling  
385 factor that controls bone homeostasis. *The FASEB Journal* **29**, 1344-1359 (2014).
- 386 27 Burnstock, G. Purinergic signalling: Its unpopular beginning, its acceptance and its  
387 exciting future. *Bioessays* **34**, 218-225 (2012).
- 388 28 Jing, D. *et al.* In situ intracellular calcium oscillations in osteocytes in intact mouse  
389 long bones under dynamic mechanical loading. *The FASEB Journal* **28**, 1582-1592  
390 (2014).
- 391 29 Rodrigues-Ribeiro, R., Alvarenga, E. C., Calio, M. L., Paredes-Gamero, E. J. & Ferreira,  
392 A. T. Dual role of P2 receptors during osteoblast differentiation. *Cell biochemistry and*  
393 *biophysics* **71**, 1225-1233 (2015).
- 394 30 Nakamura, E. I. *et al.* ATP activates DNA synthesis by acting on P2X receptors in  
395 human osteoblast-like MG-63 cells. *American Journal of Physiology-Cell Physiology*

- 396           **279**, C510-C519 (2000).
- 397   31    Grol, M. W., Panupinthu, N., Korcok, J., Sims, S. M. & Dixon, S. J. Expression,  
398           signaling, and function of P2X7 receptors in bone. *Purinergic signalling* **5**, 205 (2009).
- 399   32    Kim, H. *et al.* The purinergic receptor P2X5 contributes to bone loss in experimental  
400           periodontitis. *BMB reports* **51**, 468 (2018).
- 401   33    Andrews, S. & FastQC, A. A quality control tool for high throughput sequence data.  
402           2010. *Google Scholar* (2015).
- 403   34    Kajitani, R. *et al.* Efficient de novo assembly of highly heterozygous genomes from  
404           whole-genome shotgun short reads. *Genome Res* **24**, 1384-1395,  
405           doi:10.1101/gr.170720.113 (2014).
- 406   35    Servant, N. *et al.* HiC-Pro: an optimized and flexible pipeline for Hi-C data processing.  
407           *Genome Biol* **16**, 259, doi:10.1186/s13059-015-0831-x (2015).
- 408   36    Durand, N. C. *et al.* Juicer Provides a One-Click System for Analyzing Loop-  
409           Resolution Hi-C Experiments. *Cell Syst* **3**, 95-98, doi:10.1016/j.cels.2016.07.002  
410           (2016).
- 411   37    Dudchenko, O. *et al.* De novo assembly of the *Aedes aegypti* genome using Hi-C yields  
412           chromosome-length scaffolds. *Science* **356**, 92-95, doi:10.1126/science.aal3327 (2017).
- 413   38    Tarailo-Graovac, M. & Chen, N. Using RepeatMasker to identify repetitive elements in  
414           genomic sequences. *Current Protocols in Bioinformatics*, 4.10. 11-14.10. 14 (2009).
- 415   39    Jurka, J. *et al.* Repbase Update, a database of eukaryotic repetitive elements.  
416           *Cytogenetic and genome research* **110**, 462-467 (2005).
- 417   40    Xu, Z. & Wang, H. LTR\_FINDER: an efficient tool for the prediction of full-length  
418           LTR retrotransposons. *Nucleic acids research* **35**, W265-W268 (2007).
- 419   41    Benson, G. Tandem repeats finder: a program to analyze DNA sequences. *Nucleic acids*  
420           *research* **27**, 573 (1999).
- 421   42    Kent, W. J. BLAT--the BLAST-like alignment tool. *Genome Res* **12**, 656-664,  
422           doi:10.1101/gr.229202. Article published online before March 2002 (2002).
- 423   43    Birney, E., Clamp, M. & Durbin, R. GeneWise and genomewise. *Genome research* **14**,  
424           988-995 (2004).
- 425   44    Pertea, M., Kim, D., Pertea, G. M., Leek, J. T. & Salzberg, S. L. Transcript-level  
426           expression analysis of RNA-seq experiments with HISAT, StringTie and Ballgown. *Nat*  
427           *Protoc* **11**, 1650-1667, doi:10.1038/nprot.2016.095 (2016).
- 428   45    Haas, B. J. *et al.* De novo transcript sequence reconstruction from RNA-seq using the

- 429 Trinity platform for reference generation and analysis. *Nat Protoc* **8**, 1494-1512,  
430 doi:10.1038/nprot.2013.084 (2013).
- 431 46 Stanke, M. *et al.* AUGUSTUS: ab initio prediction of alternative transcripts. *Nucleic*  
432 *acids research* **34**, W435-W439 (2006).
- 433 47 Elsik, C. G. *et al.* Creating a honey bee consensus gene set. *Genome biology* **8**, 1 (2007).
- 434 48 Tang, H. *et al.* Unraveling ancient hexaploidy through multiply-aligned angiosperm  
435 gene maps. *Genome research*, gr. 080978.080108 (2008).
- 436 49 Li, H. & Durbin, R. Fast and accurate short read alignment with Burrows–Wheeler  
437 transform. *Bioinformatics* **25**, 1754-1760 (2009).
- 438 50 Li, H. A statistical framework for SNP calling, mutation discovery, association mapping  
439 and population genetical parameter estimation from sequencing data. *Bioinformatics*  
440 **27**, 2987-2993, doi:10.1093/bioinformatics/btr509 (2011).
- 441 51 Sporendonk, K. M. *et al.* Retinoic acid and Cyp26b1 are critical regulators of  
442 osteogenesis in the axial skeleton. *Development* **135**, 3765-3774 (2008).
- 443 52 Smith, J. J. *et al.* Sequencing of the sea lamprey (*Petromyzon marinus*) genome  
444 provides insights into vertebrate evolution. *Nature genetics* **45**, 415 (2013).

445

#### 446 **Acknowledgments**

447 We would like thank Dr. Lynn Fink for revising these manuscripts here. This work was  
448 supported by Shenzhen-Hongkong Collaboration Fund JCYJ20170412152916724 (20170331),  
449 State Key Laboratory of Agricultural Genomics (No. 2011DQ782025) and National Key R&D  
450 Program of China (2018YFD0900301).

#### 451 **Author contributions**

452 X.L., N.Y., G.F. and X.X. designed and managed this project. M.W., C.L., H.X., L.W., H.R.,



453 Y.X., Q.X., and S.P., were responsible for collecting samples, library construction, sequencing  
454 and co-drafting the manuscript. Y.Z., H.G., and J.G., worked on genome assembly, annotation,  
455 chromosome evolution, transcriptome and co-drafting the manuscript. J.W., M.L., X.G., Q.L.  
456 Y.S., and Y.L., performed data processing WGD, gene family analysis and repeat analysis.  
457 H.L., Y.G., Q.Z., C.W., L.S., X.D. carried out CRISPR/Cas9 experiments. J.S., S.L., and S.L  
458 helped to revise the manuscripts. All authors took part in the interpretation of data.

#### 459 **Competing interests**

460 The authors declare that they have no competing interests.

#### 461 **Data and materials availability**

462 This Whole Genome Shotgun project has been deposited at DDBJ/ENA/GenBank under the  
463 accession QPFF00000000 referring project PRJNA478295. Raw RNA sequencing reads have  
464 been also uploaded to the SRA database under accession SRP154403. The assembled genome  
465 can also be obtained from CNSA (CNGB Nucleotide Sequence Archive) by assembly ID:  
466 CNA0000025.

467

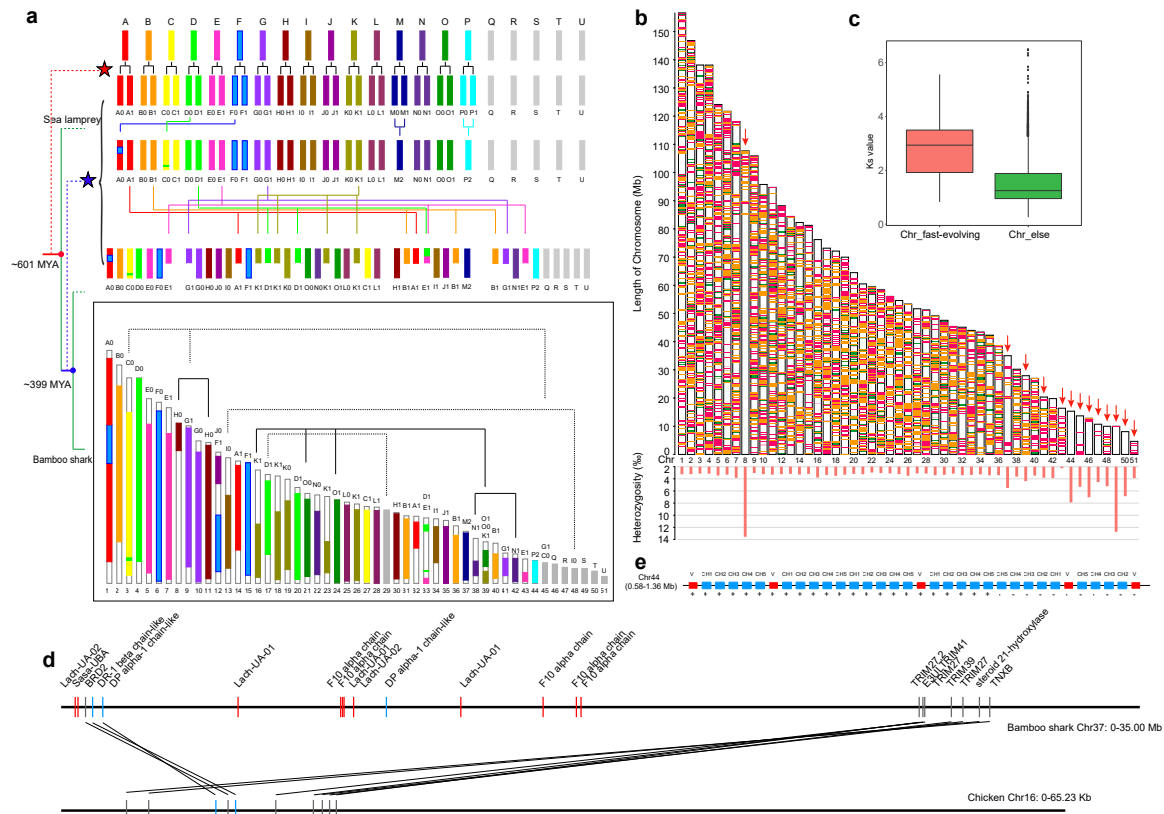

468

469 **Fig. 1. Chromosome evolution of bamboo shark. a)** Construction of the ancestral  
 470 chromosome model of elephant shark and bamboo shark. Letters from A to U represent  
 471 constructed ancestral chromosomes. The grey bars represent chromosomes which did not  
 472 experience duplication in the present study. The colored arrows represent rearrangements of  
 473 chromosomes. The black arrows represent rearrangements specific to the bamboo shark. The  
 474 dotted arrows represent potential rearrangements which are supported by gene pairs. The red  
 475 star represents whole genome duplication occurred before the divergence of sea lamprey and  
 476 gnathostome<sup>52</sup> (early than ~601 million years ago). The blue star represents rearrangements

477 of shark ancestor. The times were referred to TimeTree database. **b)** Distribution of  
 478 conserved genes of elephant shark, bamboo shark, whale shark and medaka. Magenta,  
 479 conserved regions shared by four species (R1). Orange, common regions in three shark  
 480 genome excluding R1. Green, regions shared between the white-spotted bamboo shark and  
 481 medaka excluding R1. The red arrows point out 13 fast-evolving chromosomes. **c)** up:  
 482 Comparison of *Ks* values of single copy orthologous genes between 13 fast-evolving  
 483 chromosomes and other chromosomes. down: Heterozygosity of 51 chromosomes in bamboo  
 484 shark genome. **d)** Distribution of MHC genes on chromosome 37. The red and blue  
 485 rectangles represent MHC class I and class II genes, respectively. The grey rectangles  
 486 represent non-MHC genes. Here, we only show syntenic genes and shark MHC genes  
 487 compared with chicken. **e)** Distribution of identified IgNAR loci on chromosome 44.

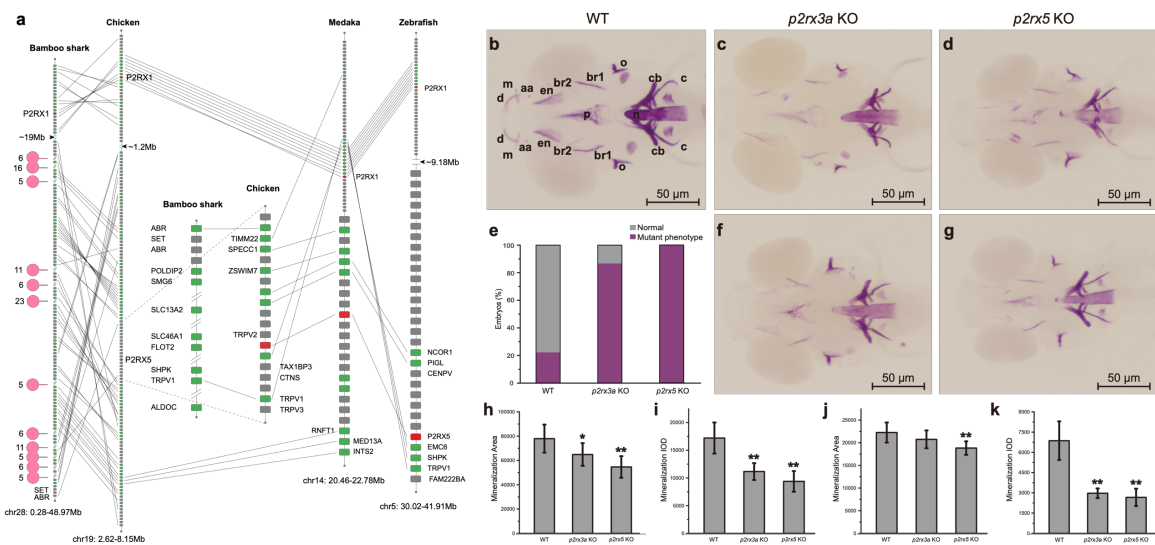

489 **Fig. 2. The loss of *p2rx5* gene in bamboo shark and targeted mutagenesis of zebrafish**  
490 ***p2rx3a* and *p2rx5* genes by CRISPR/Cas9 results in deformed or reduced bone**  
491 **development. a)** The syntenic relationship of the *p2rx5* region among bamboo shark,  
492 chicken, medaka and zebrafish. The red rectangles represent P2X genes. The lines represent  
493 syntenic genes. The numbers besides the pink dots represent gene number in the gap regions.  
494 **b)** Alizarin red staining of 9-dpf wild type zebrafish embryo; the 11 landmarks are  
495 branchiostegal ray1 (br1), cleithrum (c), ceratobranchial 5 (cb), ceratohyal (ch), dentary (d),  
496 entopterygoid (en), hyomandibular (hm), maxilla (m), notochord (n), opercle (o),  
497 parasphenoid (p). **c, f)** Alizarin red staining of 9-dpf zebrafish embryo injected with Cas9  
498 protein and single guide RNA (sgRNA) targeting exon 1 of the *p2rx3a* gene. Bone  
499 development was significantly reduced or deformed in multiple landmark positions. **d, g)**  
500 Alizarin red staining of 9-dpf zebrafish embryo injected with Cas9 protein and sgRNA  
501 targeting exon 1 of the *p2rx5* gene. Bone development was significantly deformed and  
502 strongly reduced in multiple landmark positions. **e)** Proportion of reduced or deformed bone  
503 phenotype in genotypic mutant embryos or wild type control. Phenotypic mutation rates were  
504 significantly higher in *p2rx3a* (15 of 15, 100%) and *p2rx5* (65 of 75, 86.67%) knocked out

505 individuals than in wild type control (injected with phenol red, 12 of 54, 22.22%) ( $P < 0.01$ ).

506 **h, i**) The effect of gene knockout on head skeleton mineralization area and mineralization

507 integral optical density (IOD) in 9-dpf zebrafish. A significant reduction of mineralization

508 area and IOD were observed in both *p2rx3a* ( $n = 15$ ) and *p2rx5* ( $n = 33$ ) knocked out larvae,

509 compared to wild type ( $n = 33$ ) (\* $P < 0.05$ , \*\* $P < 0.01$ ). **j, k**) The effect of gene knockout on

510 notochord mineralization area and mineralization IOD in 9-dpf zebrafish. A significant

511 reduction of mineralization IOD were observed in both *p2rx3a* ( $n = 15$ ) and *p2rx5* ( $n = 33$ )

512 knocked out larvae, compared to wild type ( $n = 33$ ), and mineralization area was significantly

513 shrunk in *p2rx5* knocked out larvae (\*\* $P < 0.01$ ).

514
